# Supplementary material for: Sponge Communities of Submarine Caves and Tunnels on the Fernando de Noronha Archipelago, Northeast Brazil
Source: MDPI journal article supplement (doi:10.3390/jmse12040657), 2024-04-16
Supplement: s1 [file s1]

**Supplementary Table S1.** List of sponge species found inside and outside the caves and tunnel studied in Fernando de Noronha, with species authorities and Aphia IDs from WoRMS.

| Species                                                                                        | Aphia ID<br>(urn:lsid:marinespecies.org:taxname:) |
|------------------------------------------------------------------------------------------------|---------------------------------------------------|
| <b>CLASS DEMOSPONGIAE</b>                                                                      |                                                   |
| <i>Agelas clathrodes</i> (Schmidt, 1870) [47]                                                  | 164823                                            |
| <i>Agelas dispar</i> Duchassaing & Michelotti, 1864 [48]                                       | 164827                                            |
| <i>Agelas</i> sp. 1                                                                            |                                                   |
| <i>Agelas</i> sp. 2                                                                            |                                                   |
| <i>Aiolochoiria crassa</i> (Hyatt, 1875) [49]                                                  | 169632                                            |
| <i>Amphimedon compressa</i> Duchassaing & Michelotti, 1864 [48]                                | 166666                                            |
| <i>Aplysina fulva</i> (Pallas, 1766) [50]                                                      | 169649                                            |
| <i>Batzella</i> sp. 1                                                                          |                                                   |
| <i>Batzella</i> sp. 2                                                                          |                                                   |
| <i>Chondrilla caribensis</i> Rützler, Duran & Piantoni, 2007 [51]                              | 248192                                            |
| <i>Chondrosia collectrix</i> (Schmidt, 1870) [47]                                              | 170373                                            |
| <i>Chondrosia</i> sp.                                                                          |                                                   |
| <i>Clathria</i> ( <i>Thalysias</i> ) <i>minuta</i> (van Soest, 1984) [52]                      | 167759                                            |
| <i>Dercitus</i> ( <i>Halinastra</i> ) <i>luteus</i> (Pulitzer-Finali, 1986) [53]               | 555685                                            |
| <i>Dercitus</i> ( <i>Stoebea</i> ) <i>latex</i> (Moraes & Muricy, 2007) [36]                   | 555785                                            |
| <i>Dictyonella</i> sp.                                                                         |                                                   |
| <i>Diplastrella megastellata</i> Hechtel, 1965 [54]                                            | 170700                                            |
| <i>Dragmacidon reticulatum</i> (Ridley & Dendy, 1886) [55]                                     | 165558                                            |
| <i>Dysidea</i> sp.                                                                             |                                                   |
| <i>Ectyoplasia ferox</i> (Duchassaing & Michelotti, 1864) [48]                                 | 168021                                            |
| <i>Erylus formosus</i> Sollas, 1886 [56]                                                       | 170070                                            |
| <i>Gastrophanella cavernicola</i> Muricy & Minervino, 2000 [34]                                | 171201                                            |
| <i>Haliclona</i> sp.                                                                           |                                                   |
| <i>Halisarca caerulea</i> Vacelet & Donadey, 1987 [57]                                         | 166037                                            |
| <i>Hyrtios proteus</i> Duchassaing & Michelotti, 1864 [48]                                     | 165352                                            |
| <i>Ircinia felix</i> (Duchassaing & Michelotti, 1864) [48]                                     | 165020                                            |
| <i>Ircinia strobilina</i> (Lamarck, 1816) [58]                                                 | 165051                                            |
| <i>Ircinia</i> sp. 1                                                                           |                                                   |
| <i>Ircinia</i> sp. 2                                                                           |                                                   |
| <i>Jaspis</i> sp.                                                                              |                                                   |
| <i>Monanchora arbuscula</i> (Duchassaing & Michelotti, 1864) [48]                              | 169016                                            |
| <i>Neopetrosia</i> sp.                                                                         |                                                   |
| <i>Niphates amorpha</i> van Soest, 1980 [59]                                                   | 166772                                            |
| <i>Oceanapia</i> sp.                                                                           |                                                   |
| <i>Petrosia</i> sp.                                                                            |                                                   |
| <i>Scopalina ruetzleri</i> (Wiedenmayer, 1977) [60]                                            | 165702                                            |
| <i>Spirastrella hartmani</i> Boury-Esnault, Klautau, Bézac, Wulff & Solé-Cava, 1999 [61]       | 170709                                            |
| <i>Suberites</i> sp.                                                                           |                                                   |
| <i>Thorecta</i> sp.                                                                            |                                                   |
| <i>Topsentia ophiraphidites</i> (de Laubenfels, 1934) [62]                                     | 165956                                            |
| <i>Verongida</i> unidentified                                                                  |                                                   |
| <i>Xestospongia muta</i> (Schmidt, 1870) [47]                                                  | 166894                                            |
| <i>Xestospongia</i> sp.                                                                        |                                                   |
| <b>CLASS CALCAREA</b>                                                                          |                                                   |
| <i>Arturia</i> cf. <i>alcatrazensis</i> (Lanna, Rossi, Cavalcanti, Hajdu & Klautau, 2007) [63] | 1030553                                           |
| <i>Ascandra</i> cf. <i>atlantica</i> (Thacker, 1908) [64]                                      | 732710                                            |
| <i>Ascandra</i> sp.                                                                            |                                                   |
| <i>Calcarea</i> unidentified                                                                   |                                                   |
| <i>Clathrina aurea</i> Solé-Cava, Klautau, Boury-Esnault, Borojevic & Thorpe, 1991 [65]        | 164649                                            |

|                                                                                       |         |
|---------------------------------------------------------------------------------------|---------|
| <i>Clathrina</i> aff. <i>luteoculcitella</i> Wörheide & Hooper, 1999 [66]             | 164672  |
| <i>Clathrina delicata</i> Fontana, Cóndor-Luján, Azevedo, Perez & Klautau, 2018 [67]  | 1248507 |
| <i>Clathrina insularis</i> Azevedo, Pádua, Moraes, Rossi, Muricy & Klautau, 2017 [39] | 1030541 |
| <i>Clathrina</i> sp. 1                                                                |         |
| <i>Clathrina</i> sp. 2                                                                |         |
| <i>Clathrina</i> sp. 3                                                                |         |
| <i>Clathrina</i> sp. 4                                                                |         |
| <i>Clathrina</i> sp. 5                                                                |         |
| <i>Clathrina</i> sp. 6                                                                |         |
| <i>Janusya</i> sp.                                                                    |         |
| <i>Neoernsta</i> sp. 1                                                                |         |
| <i>Neoernsta</i> sp. 2                                                                |         |
| <i>Neoernsta</i> sp. 3                                                                |         |
| <b>CLASS HOMOSCLEROMORPHA</b>                                                         |         |
| cf. <i>Aspiculortis</i> sp.                                                           |         |
| <i>Oscarella</i> cf. <i>zoranja</i> Pérez & Ruiz, 2018 [68]                           | 1054040 |
| <i>Oscarella</i> sp. 1                                                                |         |
| <i>Oscarella</i> sp. 2                                                                |         |
| <i>Oscarella</i> sp. 3                                                                |         |
| cf. <i>Oscarella</i> sp.                                                              |         |
| <i>Plakina coerulea</i> Cedro, Hajdu & Correa, 2013 [69]                              | 736977  |
| <i>Plakina</i> sp. 1                                                                  |         |
| <i>Plakina</i> sp. 2                                                                  |         |
| <i>Plakinastrella microspiculifera</i> Moraes & Muricy, 2003 [35]                     | 169755  |
| <i>Plakinastrella</i> sp. 1                                                           |         |
| <i>Plakinastrella</i> sp. 2                                                           |         |
| <i>Plakortis angulospiculatus</i> (Carter, 1879) [70]                                 | 169759  |
| <i>Plakortis insularis</i> Moraes & Muricy, 2003 [35]                                 | 169764  |
| <i>Plakortis microrhabdifera</i> Moraes & Muricy, 2003 [35]                           | 169768  |
| <i>Plakortis spinalis</i> Domingos, Moraes & Muricy, 2013 [38]                        | 742475  |
| <i>Plakortis</i> sp.                                                                  |         |

---
